# Supplementary material for: Contextual inhibition of fatty acid synthesis by metformin involves glucose-derived acetyl-CoA and cholesterol in pancreatic tumor cells
Source: PubMed Central journal article supplement (PMC3890070; doi:10.1007/s11306-013-0555-4), 2013-06-26
Supplement: 11306_2013_555_MOESM1_ESM.pdf [file 11306_2013_555_MOESM1_ESM.pdf]

## Supplemental Material

**Supplemental Figure 1** - Intracellular tracer-derived acetate enrichment for fatty acid synthesis of BxPC-3 and MIA PaCa-2 pancreatic adenocarcinoma cells in response to 100  $\mu$ M metformin after 24 h of culture with and without CHS pretreatment for two weeks. BxPC-3 cells treated with CHS and metformin show inhibition of acetate enrichment for palmitate (the only product of fatty acid synthase) synthesis indicating inhibition of FAS. MIA PaCa-2 cells treated with CHS only and a combination of CHS and metformin show increased acetate enrichment for *de novo* palmitate synthesis as a consequence of fatty acid futile cycling. All data are means  $\pm$  SD (n = 3 per group). \*\*,  $P < 0.01$ , #  $P < 0.05$  between cell lines. See Fig. 2 for x-axis labeling

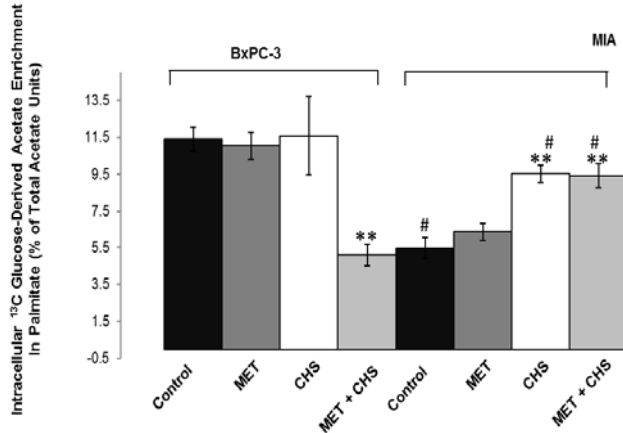

Supplemental Figure. 1

**Supplemental Figure 2** - Intracellular palmitate turnover via direct synthesis from tracer-derived acetate of BxPC-3 and MIA PaCa-2 pancreatic adenocarcinoma cells in response to 100  $\mu$ M metformin after 24 h of culture with and without CHS pretreatment for two weeks. No significant difference is observed between the two cell lines in terms of the rate of baseline glucose-derived *de novo* fatty acid synthesis. MIA PaCa-2 cells show a significant increase in the rate of *de novo* fatty acid synthesis from the glucose tracer after CHS pre-treatment indicating a shift from cholesterol synthesis to fatty acid metabolism due to CHS supplementation. MET treatment significantly antagonizes this CHS effect to decrease fatty acid synthesis rate. \*\*,  $P < 0.01$ , #  $P < 0.05$  between cell lines. See Fig. 2 for x-axis labeling

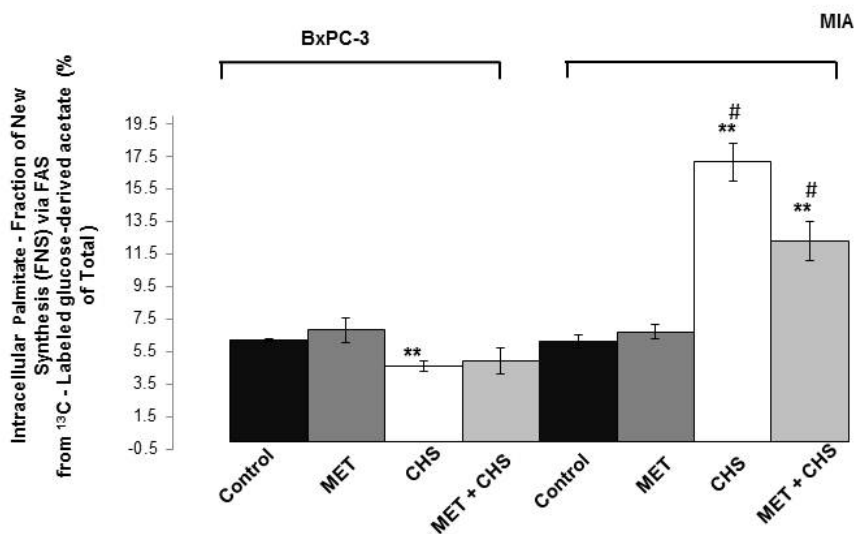

**Supplemental Figure. 2**
